# Supplementary material
Source: Springer Nature journal article supplement (https://www.springermedizin.de/resource/supplementary/12911_2011_533_MOESM9_ESM.pdf/9526026)

# ROC Curve

Sensitivity

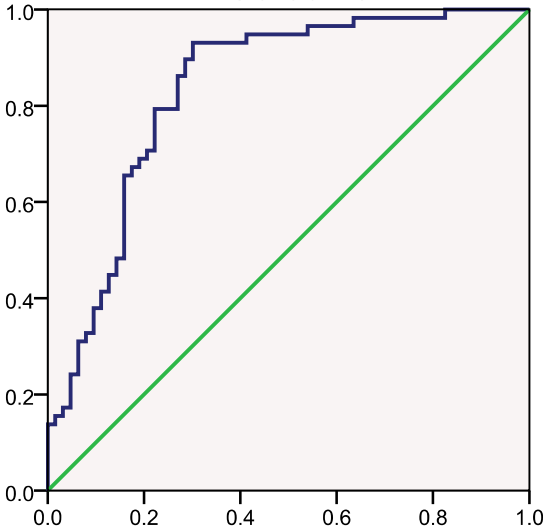

1 - Specificity

Supplement: MOESM9 [file 9526026]
